# Supplementary material for: Sex Differences in the Functional Neuroanatomy of Working Memory in Adults With ADHD
Source: Atypon-hosted journal article supplement (doi:10.1176/appi.ajp.2009.09020249), 2009-11-03
Supplement: ajp_167_01_086_02.pdf [file ajp_167_01_086_02.pdf]

**TABLE S1. Behavioral Data for the N-Back Working Memory Task**

| Group                    | X-Task               |                                 |                                                          | 2-Back Task          |                                 |                                                          |
|--------------------------|----------------------|---------------------------------|----------------------------------------------------------|----------------------|---------------------------------|----------------------------------------------------------|
|                          | % Correct, mean (SD) | Reaction Time (msec), mean (SD) | Reaction Time Intrasubject Variability (msec), mean (SD) | % Correct, mean (SD) | Reaction Time (msec), mean (SD) | Reaction Time Intrasubject Variability (msec), mean (SD) |
| Total                    |                      |                                 |                                                          |                      |                                 |                                                          |
| ADHD (N=43) <sup>a</sup> | 97.6 (2.0)           | 552 (99)                        | 143 (42)                                                 | 88.4 (6.9)           | 817 (161)                       | 250 (59)                                                 |
| Comparison (N=49)        | 97.6 (3.2)           | 551 (76)                        | 136 (46)                                                 | 87.2 (8.9)           | 793 (129)                       | 242 (60)                                                 |
| Men                      |                      |                                 |                                                          |                      |                                 |                                                          |
| ADHD (N=22) <sup>a</sup> | 97.5 (2.4)           | 548 (78)                        | 142 (40)                                                 | 88.6 (6.3)           | 787 (164)                       | 230 (49)                                                 |
| Comparison (N=23)        | 98.0 (1.7)           | 543 (80)                        | 130 (37)                                                 | 89.0 (8.3)           | 798 (138)                       | 228 (52)                                                 |
| Women                    |                      |                                 |                                                          |                      |                                 |                                                          |
| ADHD (N=21)              | 97.8 (1.5)           | 557 (119)                       | 144 (45)                                                 | 88.1 (7.6)           | 848 (154)                       | 271 (62)                                                 |
| Comparison (N=26)        | 97.3 (4.1)           | 557 (72)                        | 142 (52)                                                 | 85.6 (9.3)           | 788 (123)                       | 255 (65)                                                 |

ADHD=attention deficit hyperactivity disorder; X-task=control task. For all comparisons,  $p>0.05$ . There were no significant differences between groups (including between male and female comparison subjects).

<sup>a</sup>Because of technical difficulties, behavioral data for a single male ADHD subject was lost.

**TABLE S2. Brain Regions Showing Significant Correlations Between Working-Memory-Related Activation and Number of ADHD Symptoms for Men and Women With ADHD**

| Group, Direction of Correlation, and Regions Showing Significant Correlations                                                                                                                                                                                                                                                                                                                                                                                                                   | K (cluster extent in voxels) | Peak t Value | MNI Coordinates |     |    |
|-------------------------------------------------------------------------------------------------------------------------------------------------------------------------------------------------------------------------------------------------------------------------------------------------------------------------------------------------------------------------------------------------------------------------------------------------------------------------------------------------|------------------------------|--------------|-----------------|-----|----|
|                                                                                                                                                                                                                                                                                                                                                                                                                                                                                                 |                              |              | x               | y   | z  |
| ADHD men                                                                                                                                                                                                                                                                                                                                                                                                                                                                                        |                              |              |                 |     |    |
| Correlation with hyperactive symptoms                                                                                                                                                                                                                                                                                                                                                                                                                                                           |                              |              |                 |     |    |
| Negative correlation: L inferior occipital lobe (lingual and fusiform gyri [BA 17/18/19]) (extends to bilateral cerebellar hemisphere and vermis)                                                                                                                                                                                                                                                                                                                                               | 189                          | 5.02         | -6              | -93 | -9 |
| Correlation with inattentive symptoms                                                                                                                                                                                                                                                                                                                                                                                                                                                           |                              |              |                 |     |    |
| No correlations in either direction                                                                                                                                                                                                                                                                                                                                                                                                                                                             |                              |              |                 |     |    |
| ADHD women                                                                                                                                                                                                                                                                                                                                                                                                                                                                                      |                              |              |                 |     |    |
| Correlation with hyperactive symptoms                                                                                                                                                                                                                                                                                                                                                                                                                                                           |                              |              |                 |     |    |
| No correlations in either direction                                                                                                                                                                                                                                                                                                                                                                                                                                                             |                              |              |                 |     |    |
| Correlation with inattentive symptoms                                                                                                                                                                                                                                                                                                                                                                                                                                                           |                              |              |                 |     |    |
| Negative correlation: L superior temporal gyrus (BA 42), extending to orbitofrontal cortex (BA 47/12), amygdala, pre- and postcentral gyri, supramarginal gyrus (BA 40), angular gyrus (BA 39), occipital fusiform (BA 19), bilateral insula, cingulate (BA 24), paracingulate (BA 32), temporal pole (BA 38), superior temporal gyrus (BA 42), thalamus, putamen, caudate, cerebellar hemispheres, lingual gyrus, hippocampus, parahippocampal gyrus (BA 28/36), R pallidum, nucleus accumbens | 3380                         | 6.65         | -57             | -15 | 3  |

Clusters are significant at  $p < 0.05$  (corrected). For the male and female ADHD groups,  $N=23$  and  $N=21$ , respectively. ADHD=attention deficit hyperactivity disorder; R=right, L=left; BA=Brodmann's area.
