# Supplementary material for: Sex Differences in the Functional Neuroanatomy of Working Memory in Adults With ADHD
Source: Atypon-hosted journal article supplement (doi:10.1176/appi.ajp.2009.09020249), 2009-11-03

## FIGURE S1

Top panel: negative correlation of working-memory-related activation (2-back minus X-task contrast) with hyperactive symptoms in the ADHD men (N=23)

Bottom panel: negative correlation of working-memory-related activation (2-back minus X-task contrast) with inattentive symptoms in the ADHD women (N=21)

Crosshair is located on the maximum voxel for the cluster showing the correlation. Cluster is significant at  $p < 0.05$  (corrected).

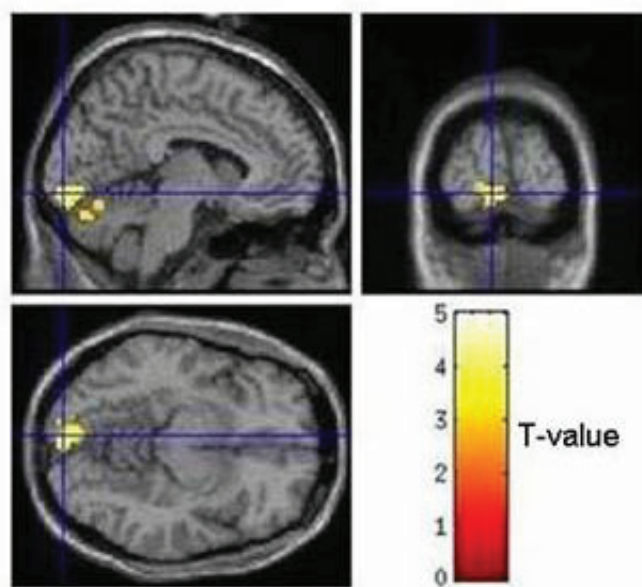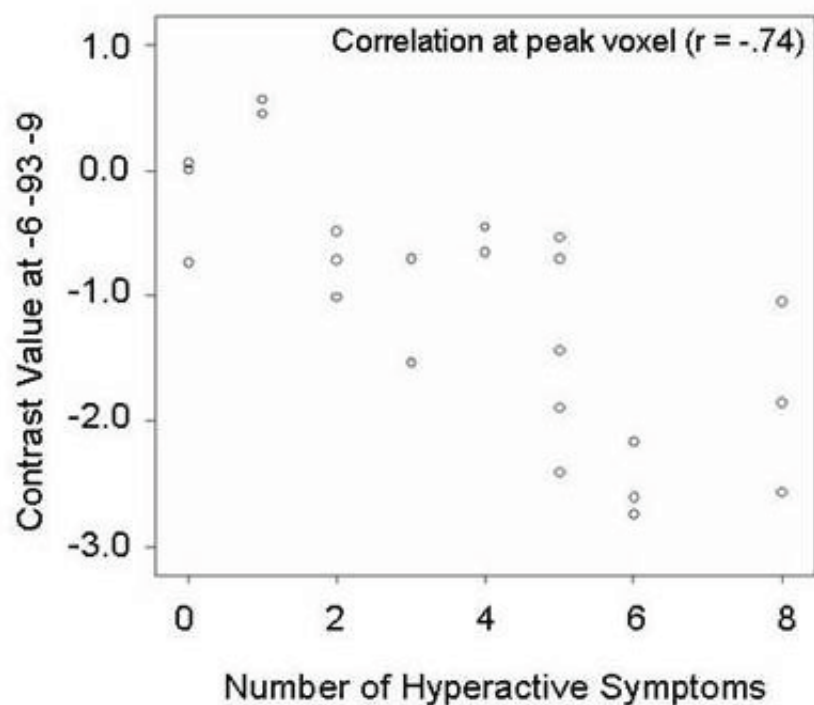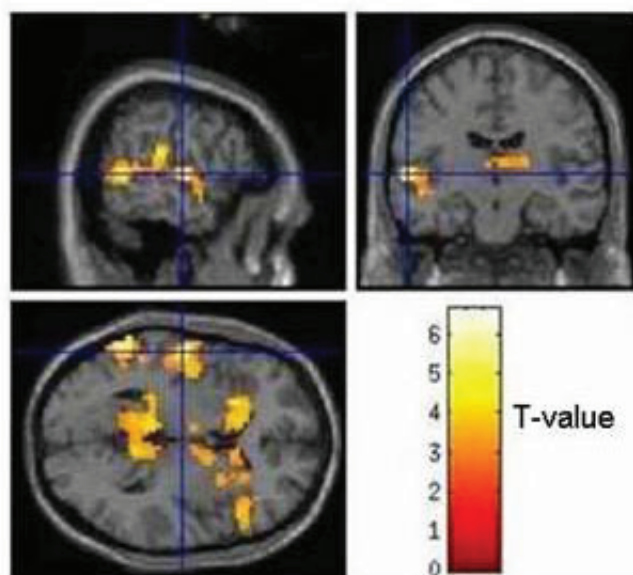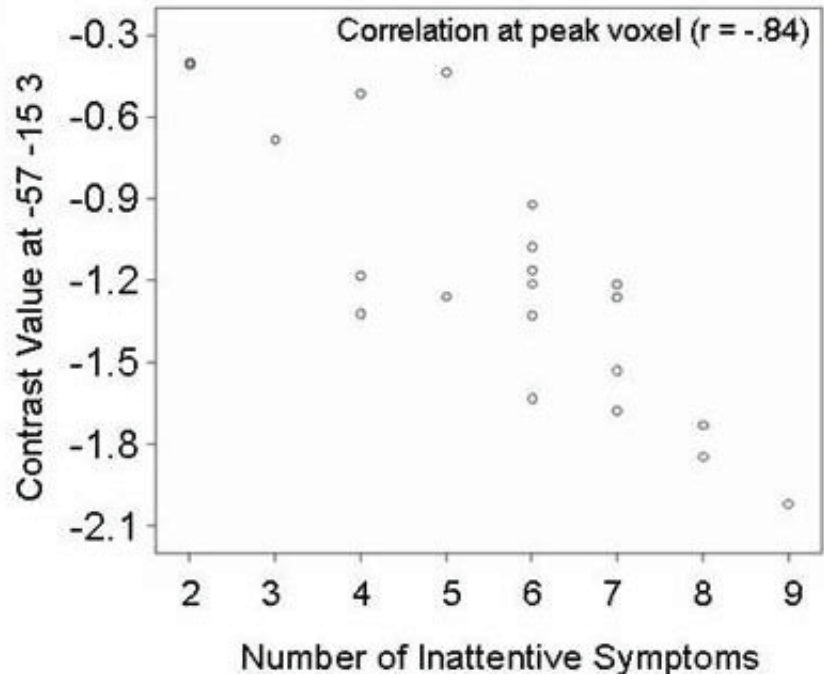

Supplement: ajp_167_01_086_03.pdf [file ajp_167_01_086_03.pdf]
